# Supplementary material for: The role of structural and fluidic aspects of room temperature ionic liquids in influencing the morphology of CdSe nano/microstructures grown in situ
Source: Royal Society of Chemistry journal article supplement (doi:10.1039/c4dt01648c), 2014-01-01
Supplement: c4dt01648c1.pdf [file c4dt01648c1.pdf]

**Role of structural and fluidic aspects of Room temperature ionic liquid in influencing the morphology of CdSe nano/microstructures grown *in situ***

Apurav Guleria, Ajay K Singh, Madhab C Rath, Sisir K Sarkar and Soumyakanti Adhikari\*  
*Radiation & Photochemistry Division, Bhabha Atomic Research Centre, Mumbai 400 085, India*

**Supporting information:**

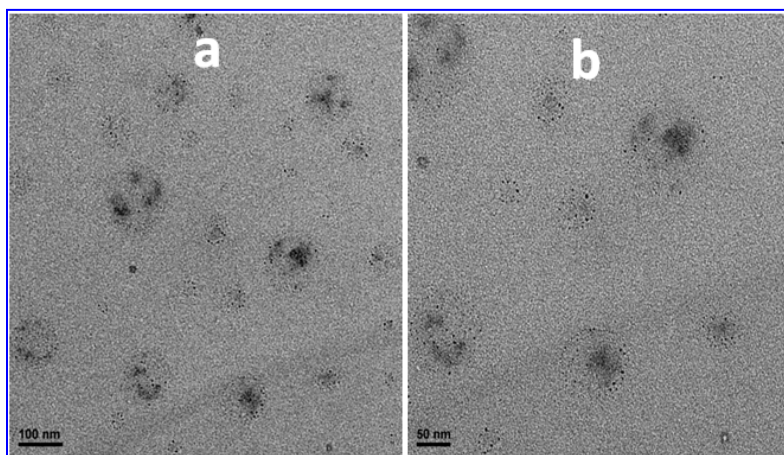

**Fig.S1.** TEM images (a & b) of the CdSe nanoparticles showing the self-assembling of the primary nanoparticles into some sort of superstructures.

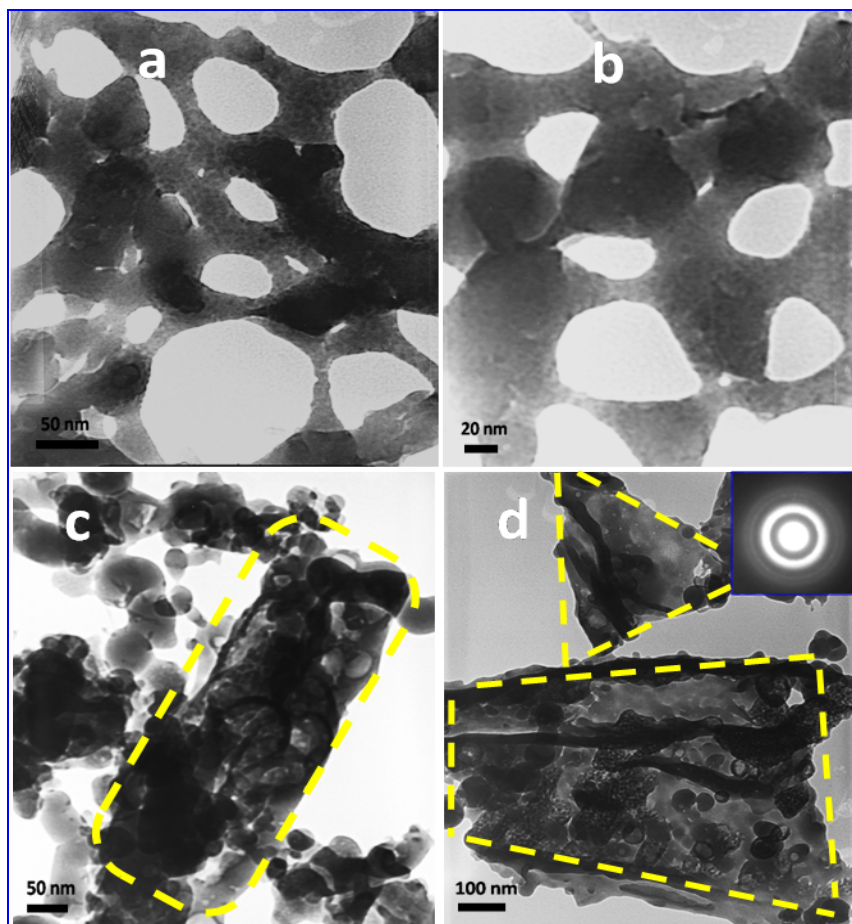

**Fig.S2.** TEM images (a & b) showing the self-assembling of primary nanoparticles. Images c & d clearly illustrates the formation of sheet like superstructures as a result of self-assembling. Inset of image d shows the SAED pattern of the corresponding structure. The images were taken after 5 hours of the reaction.

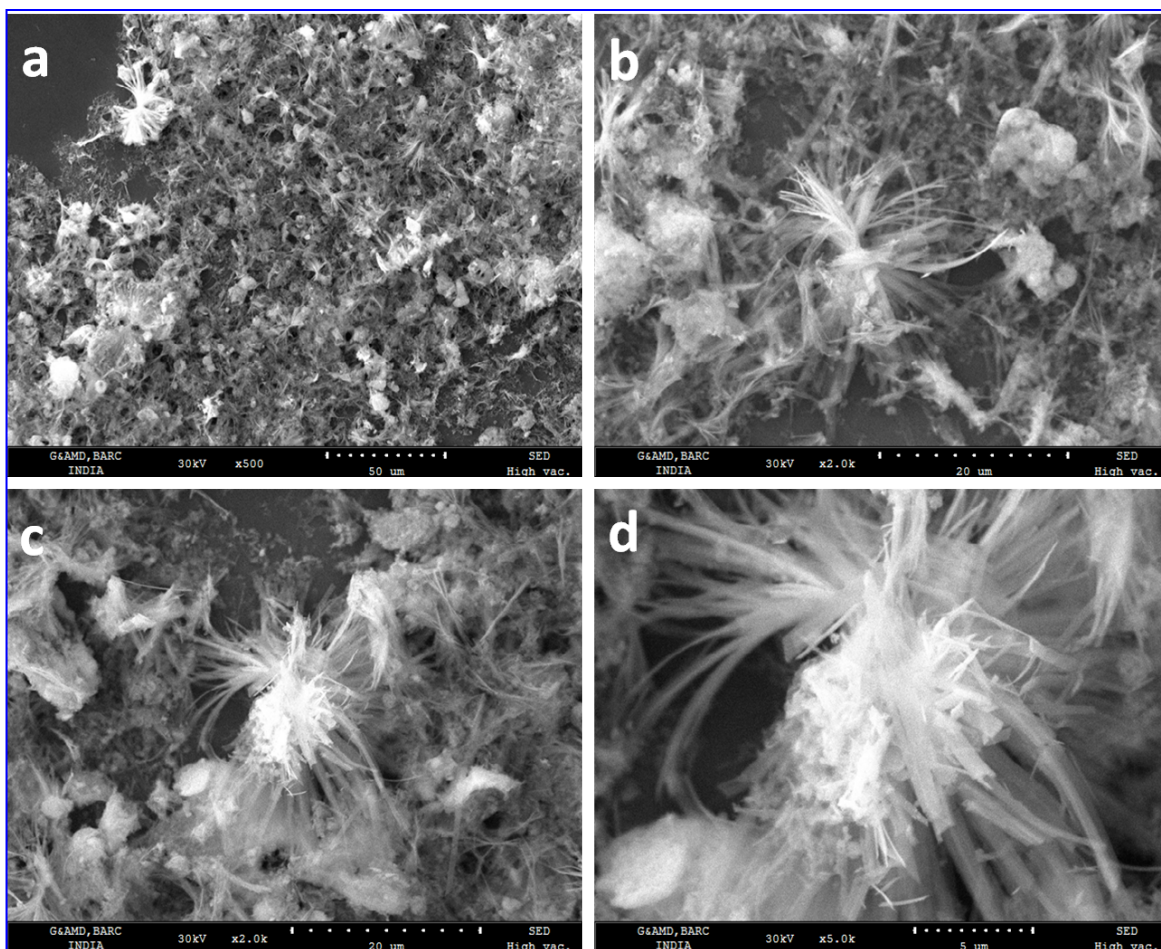

**Fig.S3.** SEM images (at different regions with various nanoscale dimensions) of as grown CdSe nanostructures synthesized in IL ([EMIM][EtSO<sub>4</sub>]) having 0.91 mole fraction of water. The images were taken after 5 hours of the reaction.

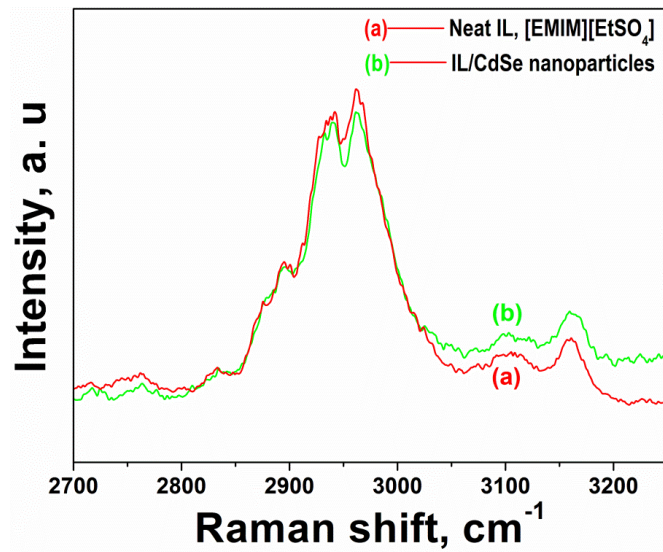

Fig.S4. Raman spectra of neat IL (a) and IL + CdSe (b).
